# Supplementary material for: Antibacterial Properties of an Experimental Dental Resin Loaded with Gold Nanoshells for Photothermal Therapy Applications
Source: MDPI journal article supplement (doi:10.3390/jfb15040100), 2024-04-11

Supplementary Materials

# Antibacterial Properties of an Experimental Dental Resin Loaded with Gold Nanoshells for Photothermal Therapy Applications

Shayan Darvish <sup>1</sup>, Dana-Gabriela Budala <sup>2,\*</sup> and Ancuta Goriuc <sup>3</sup>

<sup>1</sup> Department of Oral Health Sciences, Faculty of Dentistry, The University of British Columbia, Vancouver, BC V6T 1Z3, Canada; sdarvish@umich.edu

<sup>2</sup> Department of Prosthodontics, Faculty of Dental Medicine, “Grigore T. Popa” University of Medicine and Pharmacy, 16 Universității Street, 700115 Iași, Romania

<sup>3</sup> Department of Biochemistry, Faculty of Dental Medicine, “Grigore T. Popa” University of Medicine and Pharmacy, 16 Universității Street, 700115 Iași, Romania; ancuta.goriuc@umfiiasi.ro

\* Correspondence: dana-gabriela.bosinceanu@umfiiasi.ro

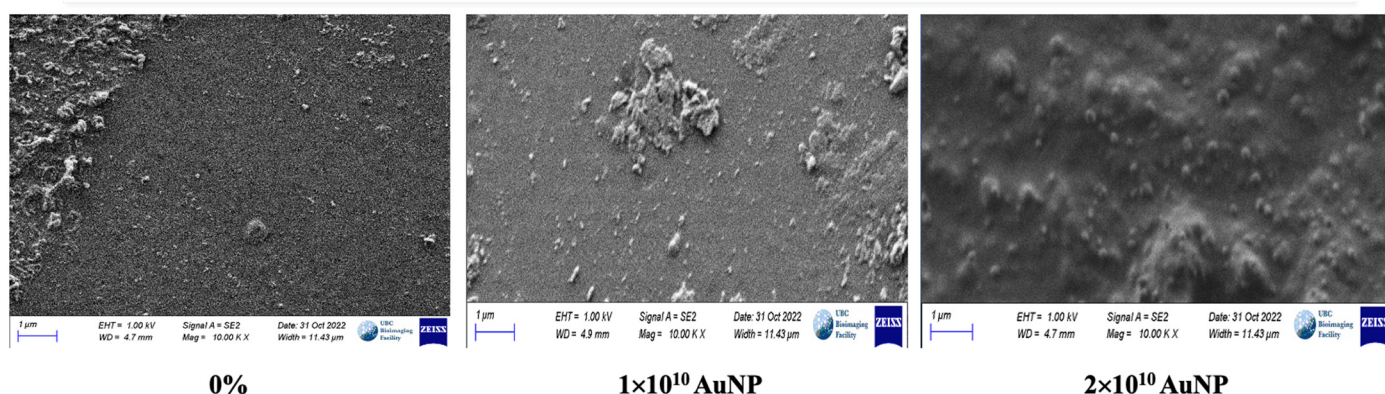

**Figure S1.** SEM images of the resin disks surface loaded with 0%,  $1 \times 10^{10}$  AuNP/ml, and  $2 \times 10^{10}$  AuNP/ml recorded at at 10kX.

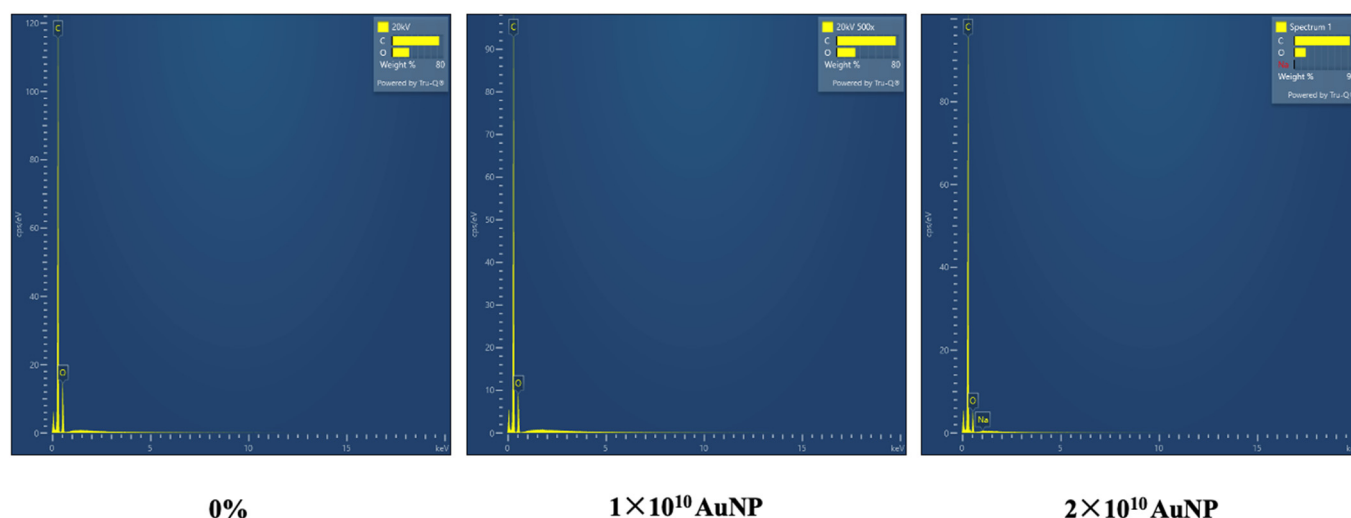

**Figure S2.** EDX results of the surface of the resin disks loaded with 0%,  $1 \times 10^{10}$  AuNP/ml, and  $2 \times 10^{10}$  AuNP/ml recorded at at 20 kv.

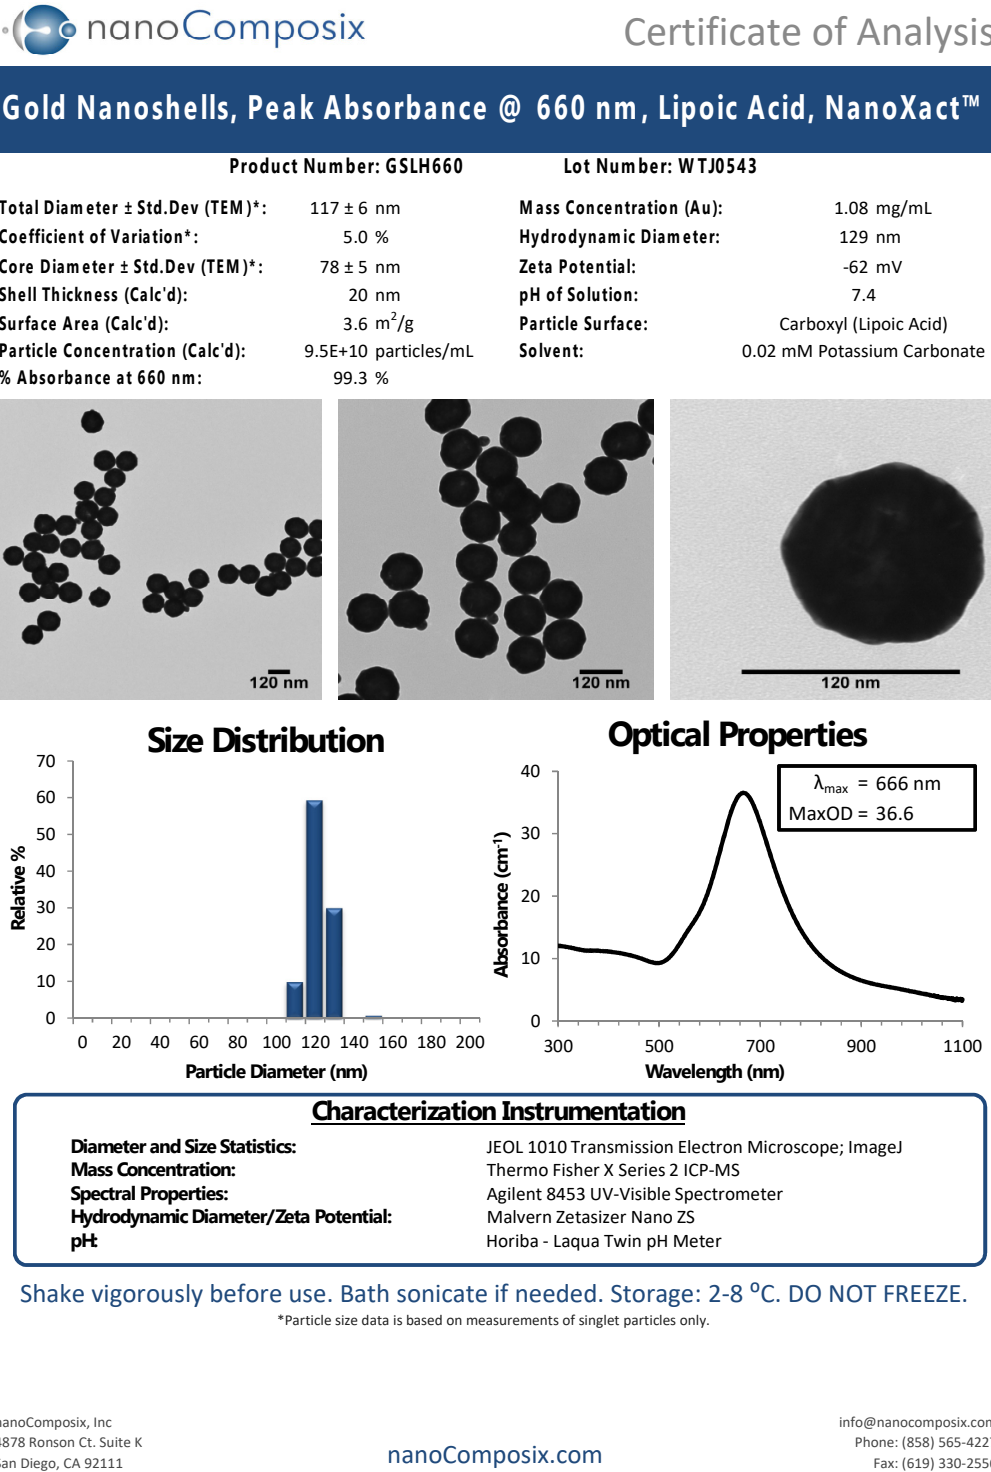

Supplement: s1 [file s1]
